# Supplementary material for: Intensive single-cell analysis reveals immune-cell diversity among healthy individuals
Source: Life Sci Alliance. 2022 Apr 5;5(7):e202201398. doi: 10.26508/lsa.202201398 (PMC8983398; doi:10.26508/lsa.202201398)
Supplement: Supplementary file 5 [file LSA-2022-01398_TableS5.xlsx]

## Sheet: Table S5
Table S5 List of genes with low-correlation value in fresh and frozen comparison
NK cell	PTPRC
	MTRNR2L12
	MALAT1
	MT-ND1
	MT-ND2
	MT-CO1
	MT-CO2
	MT-ATP6
	MT-CO3
	MT-ND3
	MT-ND4L
	MT-ND4
	MT-ND5
	MT-CYB
