# Supplementary material for: Intensive single-cell analysis reveals immune-cell diversity among healthy individuals
Source: Life Sci Alliance. 2022 Apr 5;5(7):e202201398. doi: 10.26508/lsa.202201398 (PMC8983398; doi:10.26508/lsa.202201398)
Supplement: Supplementary file 10 [file LSA-2022-01398_TableS10.xlsx]

## Sheet: Table S10
Table S10 Detected antibody level during influenza virus vaccination
pID	sample_ID	Condition	type A H1		type A H3		type B Yamagata		type B Victria
H1	1_09	pre	Positive	20	Positive	10	Positive	80	Negative	< 10
	1_10	-1 dpv	Positive	40	Positive	10	Positive	80	Negative	< 10
	1_11	+ 1 dpv	Positive	40	Positive	10	Positive	80	Negative	< 10
	1_12	+ 3 dpv	Positive	20	Positive	10	Positive	80	Negative	< 10
	1_13	+ 7 dpv	Positive	80	Positive	20	Positive	80	Positive	10
	1_14	+ 28dpv	Positive	80	Positive	20	Positive	80	Positive	10
H2	2_09	pre	Positive	40	Positive	10	Positive	80	Positive	10
	2_10	-1 dpv	Positive	40	Negative	< 10	Positive	80	Negative	< 10
	2_11	+ 1 dpv	Positive	40	Positive	10	Positive	80	Negative	< 10
	2_12	+ 3 dpv	Positive	40	Positive	10	Positive	80	Negative	< 10
	2_13	+ 7 dpv	Positive	40	Positive	10	Positive	80	Positive	20
	2_15	+ 28dpv	Positive	80	Positive	10	Positive	80	Positive	20
