# Supplementary material for: Intensive single-cell analysis reveals immune-cell diversity among healthy individuals
Source: Life Sci Alliance. 2022 Apr 5;5(7):e202201398. doi: 10.26508/lsa.202201398 (PMC8983398; doi:10.26508/lsa.202201398)
Supplement: Supplementary file 12 [file LSA-2022-01398_TableS12.xlsx]

## Sheet: Table S12
Table S12 Markers used in the CyTOF analysis
Marker	Channel	Clone
CD45	89Y	HI30
CCR6	141Pr	G034E3
CD123	143Nd	6H6
CD19	144Nd	HIB19
CD4	145Nd	RPA-T4
CD8	146Nd	RPA-T8
CD11c	147Sm	Bu15
CD16	148Nd	3G8
CD45RO	149Sm	UCHL1
CD45RA	150Nd	HI100
CD161	151Eu	HP-3G10
CCR4	152Sm	L291H4
CD25	153Eu	BC96
CD27	154Sm	O323
CD57	155Gd	HCD57
CXCR3	156Gd	G025H7
CXCR5	158Gd	J252D4
CD28	160Gd	CD28.2
CD38	161Dy	HB-7
CD56	163Dy	NCAM16.2
TCRγδ	164Dy	B1
CD294	166Er	BM16
CCR7	167Er	G043H7
CD14	168Er	63D3
CD3	170Er	UCHT1
CD20	171Yb	2H7
CD66b	172Yb	G10F5
HLA-DR	173Yb	LN3
IgD	174Yb	IA6-2
CD127	176Yb	A0195D5
