# Supplementary material for: Intensive single-cell analysis reveals immune-cell diversity among healthy individuals
Source: Life Sci Alliance. 2022 Apr 5;5(7):e202201398. doi: 10.26508/lsa.202201398 (PMC8983398; doi:10.26508/lsa.202201398)
Supplement: Supplementary file 13 [file LSA-2022-01398_TableS13.xlsx]

## Sheet: Table S13
Table S13 Summary table of scRNA-seq metadata
# High-throughput sequencing metadata template. (Version: April 28, 2020)
# All fields in this template must be completed.
# See METADATA EXAMPLES in tabs at the foot of this page.
# Field names (in blue on this page) should not be edited. Hover over cells containing field names to view field content guidelines.
# Human data. If there are patient privacy concerns regarding making data fully public through GEO, please submit to NCBI's dbGaP (http://www.ncbi.nlm.nih.gov/gap/) database. dbGaP has controlled access mechanisms and is an appropriate resource for hosting sensitive patient data.
SERIES
# This section describes the overall study. Complete all fields.
title	Intensive Single Cell Analysis Reveals Immune Cell Diversity among Healthy Individuals
summary	It is believed that immune responses are different between individuals and at different times. In addition, personal health histories and unique environmental conditions should collectively determine the present state of immune cells. However, the cellular and molecular system mechanisms underlying such heterogeneity remain largely elusive. In this study, we conducted a systematic time-lapse sing…
overall design	10x scRNA (7cases, 57samples)
contributor	Yutaka, Suzuki
supplementary file
SAMPLES
# Thoroughly describe each of the biological Samples under investigation. Tissue/cell type/cell line information is required.
# Include all biological and experimental variables in characteristics columns (for example, characteristics: tissue, characteristics: cell type, characteristics: treatment, characteristics: genotype, characteristics: disease state or any clinical variables, etc...)
# -> -> KEEP SCROLLING TO THE RIGHT FOR IMPORTANT FIELDS; RAW AND PROCESSED FILES MUST BE LISTED IN THIS SECTION -> ->
Sample name	title	source name	organism	characteristics: tissue	characteristics: case	characteristics: age	molecule	description	processed data file	raw file
SAMPLE 1	H1_01F	healthy volunteer PBMC	homo sapiens	PBMC	H1	49	polyA RNA	Healthy donor Fresh PBMC sample of H1 Daily variance day 0 for 10x single-cell RNA sequencing (5'GEX)
SAMPLE 2	H1_01	healthy volunteer PBMC	homo sapiens	PBMC	H1	49	polyA RNA	Healthy donor Frozen PBMC sample of H1 Daily variance day 0 for 10x single-cell RNA sequencing (5'GEX)
SAMPLE 3	H1_02	healthy volunteer PBMC	homo sapiens	PBMC	H1	49	polyA RNA	Healthy donor Frozen PBMC sample of H1 Daily variance day 3 for 10x single-cell RNA sequencing (5'GEX)
SAMPLE 4	H1_03	healthy volunteer PBMC	homo sapiens	PBMC	H1	49	polyA RNA	Healthy donor Frozen PBMC sample of H1 Daily variance day 7 for 10x single-cell RNA sequencing (5'GEX)
SAMPLE 5	H1_04	healthy volunteer PBMC	homo sapiens	PBMC	H1	49	polyA RNA	Healthy donor Frozen PBMC sample of H1 Daily variance day 10 for 10x single-cell RNA sequencing (5'GEX)
SAMPLE 6	H1_05	healthy volunteer PBMC	homo sapiens	PBMC	H1	49	polyA RNA	Healthy donor Frozen PBMC sample of H1 Daily variance day 14 for 10x single-cell RNA sequencing (5'GEX)
SAMPLE 7	H1_06	healthy volunteer PBMC	homo sapiens	PBMC	H1	49	polyA RNA	Healthy donor Frozen PBMC sample of H1 Daily variance day 17 for 10x single-cell RNA sequencing (5'GEX)
SAMPLE 8	H1_07	healthy volunteer PBMC	homo sapiens	PBMC	H1	49	polyA RNA	Healthy donor Frozen PBMC sample of H1 Daily variance day 21 for 10x single-cell RNA sequencing (5'GEX)
SAMPLE 9	H1_08	healthy volunteer PBMC	homo sapiens	PBMC	H1	49	polyA RNA	Healthy donor Frozen PBMC sample of H1 Daily variance day 25 for 10x single-cell RNA sequencing (5'GEX)
SAMPLE 10	H1_09	healthy volunteer PBMC	homo sapiens	PBMC	H1	49	polyA RNA	Healthy donor Frozen PBMC sample of H1 Daily variance day84 for 10x single-cell RNA sequencing (5'GEX)
SAMPLE 11	H1_10	healthy volunteer PBMC	homo sapiens	PBMC	H1	49	polyA RNA	Healthy donor Frozen PBMC sample of H1 Influenza vaccination - 1 dpv for 10x single-cell RNA sequencing (5'GEX)
SAMPLE 12	H1_11	healthy volunteer PBMC	homo sapiens	PBMC	H1	49	polyA RNA	Healthy donor Frozen PBMC sample of H1 Influenza vaccination + 1 dpv for 10x single-cell RNA sequencing (5'GEX)
SAMPLE 13	H1_12	healthy volunteer PBMC	homo sapiens	PBMC	H1	49	polyA RNA	Healthy donor Frozen PBMC sample of H1 Influenza vaccination + 3 dpv for 10x single-cell RNA sequencing (5'GEX)
SAMPLE 14	H1_13	healthy volunteer PBMC	homo sapiens	PBMC	H1	49	polyA RNA	Healthy donor Frozen PBMC sample of H1 Influenza vaccination + 5 dpv for 10x single-cell RNA sequencing (5'GEX)
SAMPLE 15	H1_14	healthy volunteer PBMC	homo sapiens	PBMC	H1	49	polyA RNA	Healthy donor Frozen PBMC sample of H1 Influenza vaccination + 28 dpv for 10x single-cell RNA sequencing (5'GEX)
SAMPLE 16	todai_054	healthy volunteer PBMC	homo sapiens	PBMC	H1	49	polyA RNA	Healthy donor Frozen PBMC sample of H1 SARS-CoV-2 vaccination - 1 dpv for 10x single-cell RNA sequencing (5'GEX)
SAMPLE 17	todai_056	healthy volunteer PBMC	homo sapiens	PBMC	H1	49	polyA RNA	Healthy donor Frozen PBMC sample of H1 SARS-CoV-2 vaccination + 1 dpv for 10x single-cell RNA sequencing (5'GEX)
SAMPLE 18	todai_058	healthy volunteer PBMC	homo sapiens	PBMC	H1	49	polyA RNA	Healthy donor Frozen PBMC sample of H1 SARS-CoV-2 vaccination + 3 dpv for 10x single-cell RNA sequencing (5'GEX)
SAMPLE 19	todai_060	healthy volunteer PBMC	homo sapiens	PBMC	H1	49	polyA RNA	Healthy donor Frozen PBMC sample of H1 SARS-CoV-2 vaccination + 7 dpv for 10x single-cell RNA sequencing (5'GEX)
SAMPLE 20	todai_064	healthy volunteer PBMC	homo sapiens	PBMC	H1	49	polyA RNA	Healthy donor Frozen PBMC sample of H1 SARS-CoV-2 vaccination + 27dpv / -1 dpv for 10x single-cell RNA sequencing (5'GEX)
SAMPLE 21	todai_066	healthy volunteer PBMC	homo sapiens	PBMC	H1	49	polyA RNA	Healthy donor Frozen PBMC sample of H1 SARS-CoV-2 vaccination +29/ +1 dpv for 10x single-cell RNA sequencing (5'GEX)
SAMPLE 22	todai_068	healthy volunteer PBMC	homo sapiens	PBMC	H1	49	polyA RNA	Healthy donor Frozen PBMC sample of H1 SARS-CoV-2 vaccination + 31/ +3 dpv for 10x single-cell RNA sequencing (5'GEX)
SAMPLE 23	todai_070	healthy volunteer PBMC	homo sapiens	PBMC	H1	49	polyA RNA	Healthy donor Frozen PBMC sample of H1 SARS-CoV-2 vaccination + 35 / + 7 dpv for 10x single-cell RNA sequencing (5'GEX)
SAMPLE 24	todai_072	healthy volunteer PBMC	homo sapiens	PBMC	H1	49	polyA RNA	Healthy donor Frozen PBMC sample of H1 SARS-CoV-2 vaccination + 56/ +28 dpv for 10x single-cell RNA sequencing (5'GEX)
SAMPLE 25	H2_01F	healthy volunteer PBMC	homo sapiens	PBMC	H2	43	polyA RNA	Healthy donor Fresh PBMC sample of H2 Daily variance day 0 for 10x single-cell RNA sequencing (5'GEX)
SAMPLE 26	H2_01	healthy volunteer PBMC	homo sapiens	PBMC	H2	43	polyA RNA	Healthy donor Frozen PBMC sample of H2 Daily variance day 0 for 10x single-cell RNA sequencing (5'GEX)
SAMPLE 27	H2_02	healthy volunteer PBMC	homo sapiens	PBMC	H2	43	polyA RNA	Healthy donor Frozen PBMC sample of H2 Daily variance day 3 for 10x single-cell RNA sequencing (5'GEX)
SAMPLE 28	H2_03	healthy volunteer PBMC	homo sapiens	PBMC	H2	43	polyA RNA	Healthy donor Frozen PBMC sample of H2 Daily variance day 7 for 10x single-cell RNA sequencing (5'GEX)
SAMPLE 29	H2_04	healthy volunteer PBMC	homo sapiens	PBMC	H2	43	polyA RNA	Healthy donor Frozen PBMC sample of H2 Daily variance day 10 for 10x single-cell RNA sequencing (5'GEX)
SAMPLE 30	H2_05	healthy volunteer PBMC	homo sapiens	PBMC	H2	43	polyA RNA	Healthy donor Frozen PBMC sample of H2 Daily variance day 14 for 10x single-cell RNA sequencing (5'GEX)
SAMPLE 31	H2_06	healthy volunteer PBMC	homo sapiens	PBMC	H2	43	polyA RNA	Healthy donor Frozen PBMC sample of H2 Daily variance day 17 for 10x single-cell RNA sequencing (5'GEX)
SAMPLE 32	H2_07	healthy volunteer PBMC	homo sapiens	PBMC	H2	43	polyA RNA	Healthy donor Frozen PBMC sample of H2 Daily variance day 21 for 10x single-cell RNA sequencing (5'GEX)
SAMPLE 33	H2_08	healthy volunteer PBMC	homo sapiens	PBMC	H2	43	polyA RNA	Healthy donor Frozen PBMC sample of H2 Daily variance day 25 for 10x single-cell RNA sequencing (5'GEX)
SAMPLE 34	H2_09	healthy volunteer PBMC	homo sapiens	PBMC	H2	43	polyA RNA	Healthy donor Frozen PBMC sample of H2 Influenza vaccination day84 for 10x single-cell RNA sequencing (5'GEX)
SAMPLE 35	H2_10	healthy volunteer PBMC	homo sapiens	PBMC	H2	43	polyA RNA	Healthy donor Frozen PBMC sample of H2 Influenza vaccination - 1 dpv for 10x single-cell RNA sequencing (5'GEX)
SAMPLE 36	H2_11	healthy volunteer PBMC	homo sapiens	PBMC	H2	43	polyA RNA	Healthy donor Frozen PBMC sample of H2 Influenza vaccination + 1 dpv for 10x single-cell RNA sequencing (5'GEX)
SAMPLE 37	H2_12	healthy volunteer PBMC	homo sapiens	PBMC	H2	43	polyA RNA	Healthy donor Frozen PBMC sample of H2 Influenza vaccination + 3 dpv for 10x single-cell RNA sequencing (5'GEX)
SAMPLE 38	H2_13	healthy volunteer PBMC	homo sapiens	PBMC	H2	43	polyA RNA	Healthy donor Frozen PBMC sample of H2 Influenza vaccination + 5 dpv for 10x single-cell RNA sequencing (5'GEX)
SAMPLE 39	H2_15	healthy volunteer PBMC	homo sapiens	PBMC	H2	43	polyA RNA	Healthy donor Frozen PBMC sample of H2 Influenza vaccination + 28 dpv for 10x single-cell RNA sequencing (5'GEX)
SAMPLE 40	H3_01	healthy volunteer PBMC	homo sapiens	PBMC	H3	38	polyA RNA	Healthy donor Frozen PBMC sample of H3 Individual variance day0 for 10x single-cell RNA sequencing (5'GEX)
SAMPLE 41	H4_01	healthy volunteer PBMC	homo sapiens	PBMC	H4	31	polyA RNA	Healthy donor Frozen PBMC sample of H4 Individual variance day0 for 10x single-cell RNA sequencing (5'GEX)
SAMPLE 42	H5_01	healthy volunteer PBMC	homo sapiens	PBMC	H5	47	polyA RNA	Healthy donor Frozen PBMC sample of H5 Individual variance day0 for 10x single-cell RNA sequencing (5'GEX)
SAMPLE 43	H6_01	healthy volunteer PBMC	homo sapiens	PBMC	H6	52	polyA RNA	Healthy donor Frozen PBMC sample of H6 individual variance day0 for 10x single-cell RNA sequencing (5'GEX)
SAMPLE 44	todai_055	healthy volunteer PBMC	homo sapiens	PBMC	H6	52	polyA RNA	Healthy donor Frozen PBMC sample of H6 SARS-CoV-2 vaccination - 1 dpv for 10x single-cell RNA sequencing (5'GEX)
SAMPLE 45	todai_057	healthy volunteer PBMC	homo sapiens	PBMC	H6	52	polyA RNA	Healthy donor Frozen PBMC sample of H6 SARS-CoV-2 vaccination + 1 dpv for 10x single-cell RNA sequencing (5'GEX)
SAMPLE 46	todai_059	healthy volunteer PBMC	homo sapiens	PBMC	H6	52	polyA RNA	Healthy donor Frozen PBMC sample of H6 SARS-CoV-2 vaccination + 3 dpv for 10x single-cell RNA sequencing (5'GEX)
SAMPLE 47	todai_061	healthy volunteer PBMC	homo sapiens	PBMC	H6	52	polyA RNA	Healthy donor Frozen PBMC sample of H6 SARS-CoV-2 vaccination + 7 dpv for 10x single-cell RNA sequencing (5'GEX)
SAMPLE 48	todai_065	healthy volunteer PBMC	homo sapiens	PBMC	H6	52	polyA RNA	Healthy donor Frozen PBMC sample of H6 SARS-CoV-2 vaccination + 27dpv / -1 dpv for 10x single-cell RNA sequencing (5'GEX)
SAMPLE 49	todai_067	healthy volunteer PBMC	homo sapiens	PBMC	H6	52	polyA RNA	Healthy donor Frozen PBMC sample of H6 SARS-CoV-2 vaccination +29/ +1 dpv for 10x single-cell RNA sequencing (5'GEX)
SAMPLE 50	todai_069	healthy volunteer PBMC	homo sapiens	PBMC	H6	52	polyA RNA	Healthy donor Frozen PBMC sample of H6 SARS-CoV-2 vaccination + 31/ +3 dpv for 10x single-cell RNA sequencing (5'GEX)
SAMPLE 51	todai_071	healthy volunteer PBMC	homo sapiens	PBMC	H6	52	polyA RNA	Healthy donor Frozen PBMC sample of H6 SARS-CoV-2 vaccination + 35 / + 7 dpv for 10x single-cell RNA sequencing (5'GEX)
SAMPLE 52	todai_073	healthy volunteer PBMC	homo sapiens	PBMC	H6	52	polyA RNA	Healthy donor Frozen PBMC sample of H6 SARS-CoV-2 vaccination + 56/ +28 dpv for 10x single-cell RNA sequencing (5'GEX)
SAMPLE 53	H7_01	healthy volunteer PBMC	homo sapiens	PBMC	H7	69	polyA RNA	Healthy donor Frozen PBMC sample of H7 SARS-CoV-2 vaccination day0 for 10x single-cell RNA sequencing (5'GEX)
SAMPLE 54	todai_029a	healthy volunteer PBMC	homo sapiens	PBMC	H7	69	polyA RNA	Healthy donor Frozen PBMC sample of H7 SARS-CoV-2 vaccination + 1 dpv for 10x single-cell RNA sequencing (5'GEX)
SAMPLE 55	todai_062	healthy volunteer PBMC	homo sapiens	PBMC	H7	69	polyA RNA	Healthy donor Frozen PBMC sample of H7 SARS-CoV-2 vaccination + 22/ +1 dpv for 10x single-cell RNA sequencing (5'GEX)
SAMPLE 56	todai_074	healthy volunteer PBMC	homo sapiens	PBMC	H7	69	polyA RNA	Healthy donor Frozen PBMC sample of H7 SARS-CoV-2 vaccination +32 / +11 dpv for 10x single-cell RNA sequencing (5'GEX)
SAMPLE 57	todai_076	healthy volunteer PBMC	homo sapiens	PBMC	H7	69	polyA RNA	Healthy donor Frozen PBMC sample of H7 SARS-CoV-2 vaccination +49 / +28 dpv for 10x single-cell RNA sequencing (5'GEX)
PROTOCOLS
# Protocols applicable to only a subset of Samples can be included as additional columns of the SAMPLES section above instead.
growth protocol
treatment protocol
extract protocol	PBMCs were aquired from Whole blood using lymphoprep. Except for "fresh" samples, cells are frozen with cellbanker until library construction.
library construction protocol	Libraries were generated with a Chromium controller from 10X Genomics according to the manufacturer's instructions. Approximately 17,400 cells were loaded into each channel for trageting 10,000 cells output and processed using the Chromium Single Cell 5' v1 reagent kit (10X Genomics).
library strategy	scRNA-seq
DATA PROCESSING PIPELINE
# Data processing steps include base-calling, alignment, filtering, peak-calling, generation of normalized abundance measurements etc…
# For each step provide a description, as well as software name, version, parameters, if applicable.
data processing step	Raw sequence reads were processed from 10X Genomics' Cell Ranger v.5.0.0 pipeline and generated fastq files. In brief, the demultiplexed fastq files were aligned to a custom reference genome with the tdTomato sequence added to the mm10/GRCm38 reference transcriptome, and the gene expression matrix was counted using the Cellranger count program.
genome build	hg38
processed data files format and content
# For each file listed in the "processed data file" columns of the SAMPLES section, provide additional information below.
PROCESSED DATA FILES
file name	file type	file checksum
# For each file listed in the "raw file" columns of the SAMPLES section above, provide additional information below.
RAW FILES
file name	file type	file checksum	instrument model	single or paired-end
	fastq		Illumina NovaSeq 6000	paired-end
# For paired-end experiments, list the 2 (or more) fastq files from the same run. For SOLiD experiments, list the 4 file names (include "file name 3" and "file name 4" columns).
PAIRED-END EXPERIMENTS
file name 1	file name 2
