# Supplementary material for: Intensive single-cell analysis reveals immune-cell diversity among healthy individuals
Source: Life Sci Alliance. 2022 Apr 5;5(7):e202201398. doi: 10.26508/lsa.202201398 (PMC8983398; doi:10.26508/lsa.202201398)
Supplement: Supplementary file 14 [file LSA-2022-01398_TableS14.xlsx]

## Sheet: Table S14
Table S14 Summary table of scVDJ-seq metadata
Project
study_id	NULL-LIKE
study_title	Intensive Single Cell Analysis Reveals Immune Cell Diversity among Healthy Individuals
study_type	id:OMIT:0028427,value:Healthy Volunteers
inclusion_exclusion_criteria	NULL-LIKE
grants	JST Moonshot R&D – MILLENNIA Program Grant Number JPMJMS2025
collected_by	ysuzuki@hgc.jp
lab_name	Department of Computational Biology and Medical Sciences,Graduate School of Frontier Sciences, The University of Tokyo
lab_address	Kashiwa, Chiba, Japan
submitted_by	ysuzuki@hgc.jp
pub_ids	NULL-LIKE
keywords_study
subject_id	NULL-LIKE
synthetic
species	id: NCBITAXON:9606, value: Homo sapiens
sex	pooled
age_min	31
age_max	69
age_unit	id: UO:0000036, value: year
age_event	NULL-LIKE
ancestry_population	unknown
ethnicity	Japanese,Indonesia,Thailand
race	Japanese,Indonesia,Thailand
strain_name	NULL-LIKE
linked_subjects	NULL-LIKE
link_type	NULL-LIKE
study_group_description	healthy
disease_diagnosis	NULL-LIKE
disease_length	NULL-LIKE
disease_stage	NULL-LIKE
prior_therapies	NULL-LIKE
immunogen	NULL-LIKE
intervention	NULL-LIKE
medical_history	NULL-LIKE
Sample
Field	H1_01F	H1_01	H1_02	H1_03	H1_04	H1_05	H1_06	H1_07	H1_08	H1_09	H1_10	H1_11	H1_12	H1_13	H1_14	todai_054	todai_056	todai_058	todai_060	todai_064	todai_066	todai_068	todai_070	todai_072	H2_01F	H2_01	H2_02	H2_03	H2_04	H2_05	H2_06	H2_07	H2_08	H2_09	H2_10	H2_11	H2_12	H2_13	H2_15	H3_01	H4_01	H5_01	H6_01	todai_055	todai_057	todai_059	todai_061	todai_065	todai_067
sample_id	H1_01F	H1_01	H1_02	H1_03	H1_04	H1_05	H1_06	H1_07	H1_08	H1_09	H1_10	H1_11	H1_12	H1_13	H1_14	todai_054	todai_056	todai_058	todai_060	todai_064	todai_066	todai_068	todai_070	todai_072	H2_01F	H2_01	H2_02	H2_03	H2_04	H2_05	H2_06	H2_07	H2_08	H2_09	H2_10	H2_11	H2_12	H2_13	H2_15	H3_01	H4_01	H5_01	H6_01	todai_055	todai_057	todai_059	todai_061	todai_065	todai_067
sample_type	PBMC	PBMC	PBMC	PBMC	PBMC	PBMC	PBMC	PBMC	PBMC	PBMC	PBMC	PBMC	PBMC	PBMC	PBMC	PBMC	PBMC	PBMC	PBMC	PBMC	PBMC	PBMC	PBMC	PBMC	PBMC	PBMC	PBMC	PBMC	PBMC	PBMC	PBMC	PBMC	PBMC	PBMC	PBMC	PBMC	PBMC	PBMC	PBMC	PBMC	PBMC	PBMC	PBMC	PBMC	PBMC	PBMC	PBMC	PBMC	PBMC
tissue	id:NCIT:C173496,value: venous blood	id:NCIT:C173496,value: venous blood	id:NCIT:C173496,value: venous blood	id:NCIT:C173496,value: venous blood	id:NCIT:C173496,value: venous blood	id:NCIT:C173496,value: venous blood	id:NCIT:C173496,value: venous blood	id:NCIT:C173496,value: venous blood	id:NCIT:C173496,value: venous blood	id:NCIT:C173496,value: venous blood	id:NCIT:C173496,value: venous blood	id:NCIT:C173496,value: venous blood	id:NCIT:C173496,value: venous blood	id:NCIT:C173496,value: venous blood	id:NCIT:C173496,value: venous blood	id:NCIT:C173496,value: venous blood	id:NCIT:C173496,value: venous blood	id:NCIT:C173496,value: venous blood	id:NCIT:C173496,value: venous blood	id:NCIT:C173496,value: venous blood	id:NCIT:C173496,value: venous blood	id:NCIT:C173496,value: venous blood	id:NCIT:C173496,value: venous blood	id:NCIT:C173496,value: venous blood	id:NCIT:C173496,value: venous blood	id:NCIT:C173496,value: venous blood	id:NCIT:C173496,value: venous blood	id:NCIT:C173496,value: venous blood	id:NCIT:C173496,value: venous blood	id:NCIT:C173496,value: venous blood	id:NCIT:C173496,value: venous blood	id:NCIT:C173496,value: venous blood	id:NCIT:C173496,value: venous blood	id:NCIT:C173496,value: venous blood	id:NCIT:C173496,value: venous blood	id:NCIT:C173496,value: venous blood	id:NCIT:C173496,value: venous blood	id:NCIT:C173496,value: venous blood	id:NCIT:C173496,value: venous blood	id:NCIT:C173496,value: venous blood	id:NCIT:C173496,value: venous blood	id:NCIT:C173496,value: venous blood	id:NCIT:C173496,value: venous blood	id:NCIT:C173496,value: venous blood	id:NCIT:C173496,value: venous blood	id:NCIT:C173496,value: venous blood	id:NCIT:C173496,value: venous blood	id:NCIT:C173496,value: venous blood	id:NCIT:C173496,value: venous blood
anatomic_site	PBMC	PBMC	PBMC	PBMC	PBMC	PBMC	PBMC	PBMC	PBMC	PBMC	PBMC	PBMC	PBMC	PBMC	PBMC	PBMC	PBMC	PBMC	PBMC	PBMC	PBMC	PBMC	PBMC	PBMC	PBMC	PBMC	PBMC	PBMC	PBMC	PBMC	PBMC	PBMC	PBMC	PBMC	PBMC	PBMC	PBMC	PBMC	PBMC	PBMC	PBMC	PBMC	PBMC	PBMC	PBMC	PBMC	PBMC	PBMC	PBMC
disease_state_sample	healty	healty	healty	healty	healty	healty	healty	healty	healty	healty	healty	healty	healty	healty	healty	healty	healty	healty	healty	healty	healty	healty	healty	healty	healty	healty	healty	healty	healty	healty	healty	healty	healty	healty	healty	healty	healty	healty	healty	healty	healty	healty	healty	healty	healty	healty	healty	healty	healty
collection_time_point_relative	day 0	day 0	day 3	day 7	day 10	day 14	day 17	day 21	day 25	day84	- 1 dpv	+ 1 dpv	+ 3 dpv	+ 5 dpv	+ 28 dpv	- 1 dpv	+ 1 dpv	+ 3 dpv	+ 7 dpv	+ 27dpv / -1 dpv	+29/ +1 dpv	+ 31/ +3 dpv	+ 35 / + 7 dpv	+ 56/ +28 dpv	day 0	day 0	day 3	day 7	day 10	day 14	day 17	day 21	day 25	day84	- 1 dpv	+ 1 dpv	+ 3 dpv	+ 5 dpv	+ 28 dpv	day0	day0	day0	day0	- 1 dpv	+ 1 dpv	+ 3 dpv	+ 7 dpv	+ 27dpv / -1 dpv	+29/ +1 dpv
collection_time_point_reference	Daily variance	Daily variance	Daily variance	Daily variance	Daily variance	Daily variance	Daily variance	Daily variance	Daily variance	Daily variance	Influenza vaccination	Influenza vaccination	Influenza vaccination	Influenza vaccination	Influenza vaccination	SARS-CoV-2 vaccination	SARS-CoV-2 vaccination	SARS-CoV-2 vaccination	SARS-CoV-2 vaccination	SARS-CoV-2 vaccination	SARS-CoV-2 vaccination	SARS-CoV-2 vaccination	SARS-CoV-2 vaccination	SARS-CoV-2 vaccination	Daily variance	Daily variance	Daily variance	Daily variance	Daily variance	Daily variance	Daily variance	Daily variance	Daily variance	Influenza vaccination	Influenza vaccination	Influenza vaccination	Influenza vaccination	Influenza vaccination	Influenza vaccination	Individual variance	Individual variance	Individual variance	individual variance	SARS-CoV-2 vaccination	SARS-CoV-2 vaccination	SARS-CoV-2 vaccination	SARS-CoV-2 vaccination	SARS-CoV-2 vaccination	SARS-CoV-2 vaccination
biomaterial_provider	NULL-LIKE	NULL-LIKE	NULL-LIKE	NULL-LIKE	NULL-LIKE	NULL-LIKE	NULL-LIKE	NULL-LIKE	NULL-LIKE	NULL-LIKE	NULL-LIKE	NULL-LIKE	NULL-LIKE	NULL-LIKE	NULL-LIKE	NULL-LIKE	NULL-LIKE	NULL-LIKE	NULL-LIKE	NULL-LIKE	NULL-LIKE	NULL-LIKE	NULL-LIKE	NULL-LIKE	NULL-LIKE	NULL-LIKE	NULL-LIKE	NULL-LIKE	NULL-LIKE	NULL-LIKE	NULL-LIKE	NULL-LIKE	NULL-LIKE	NULL-LIKE	NULL-LIKE	NULL-LIKE	NULL-LIKE	NULL-LIKE	NULL-LIKE	NULL-LIKE	NULL-LIKE	NULL-LIKE	NULL-LIKE	NULL-LIKE	NULL-LIKE	NULL-LIKE	NULL-LIKE	NULL-LIKE	NULL-LIKE
tissue_processing	lymphoprep	lymphoprep	lymphoprep	lymphoprep	lymphoprep	lymphoprep	lymphoprep	lymphoprep	lymphoprep	lymphoprep	lymphoprep	lymphoprep	lymphoprep	lymphoprep	lymphoprep	lymphoprep	lymphoprep	lymphoprep	lymphoprep	lymphoprep	lymphoprep	lymphoprep	lymphoprep	lymphoprep	lymphoprep	lymphoprep	lymphoprep	lymphoprep	lymphoprep	lymphoprep	lymphoprep	lymphoprep	lymphoprep	lymphoprep	lymphoprep	lymphoprep	lymphoprep	lymphoprep	lymphoprep	lymphoprep	lymphoprep	lymphoprep	lymphoprep	lymphoprep	lymphoprep	lymphoprep	lymphoprep	lymphoprep	lymphoprep
cell_subset	NULL-LIKE	NULL-LIKE	NULL-LIKE	NULL-LIKE	NULL-LIKE	NULL-LIKE	NULL-LIKE	NULL-LIKE	NULL-LIKE	NULL-LIKE	NULL-LIKE	NULL-LIKE	NULL-LIKE	NULL-LIKE	NULL-LIKE	NULL-LIKE	NULL-LIKE	NULL-LIKE	NULL-LIKE	NULL-LIKE	NULL-LIKE	NULL-LIKE	NULL-LIKE	NULL-LIKE	NULL-LIKE	NULL-LIKE	NULL-LIKE	NULL-LIKE	NULL-LIKE	NULL-LIKE	NULL-LIKE	NULL-LIKE	NULL-LIKE	NULL-LIKE	NULL-LIKE	NULL-LIKE	NULL-LIKE	NULL-LIKE	NULL-LIKE	NULL-LIKE	NULL-LIKE	NULL-LIKE	NULL-LIKE	NULL-LIKE	NULL-LIKE	NULL-LIKE	NULL-LIKE	NULL-LIKE	NULL-LIKE
cell_phenotype	NULL-LIKE	NULL-LIKE	NULL-LIKE	NULL-LIKE	NULL-LIKE	NULL-LIKE	NULL-LIKE	NULL-LIKE	NULL-LIKE	NULL-LIKE	NULL-LIKE	NULL-LIKE	NULL-LIKE	NULL-LIKE	NULL-LIKE	NULL-LIKE	NULL-LIKE	NULL-LIKE	NULL-LIKE	NULL-LIKE	NULL-LIKE	NULL-LIKE	NULL-LIKE	NULL-LIKE	NULL-LIKE	NULL-LIKE	NULL-LIKE	NULL-LIKE	NULL-LIKE	NULL-LIKE	NULL-LIKE	NULL-LIKE	NULL-LIKE	NULL-LIKE	NULL-LIKE	NULL-LIKE	NULL-LIKE	NULL-LIKE	NULL-LIKE	NULL-LIKE	NULL-LIKE	NULL-LIKE	NULL-LIKE	NULL-LIKE	NULL-LIKE	NULL-LIKE	NULL-LIKE	NULL-LIKE	NULL-LIKE
cell_species	id: NCBITAXON:9606, value: Homo sapiens	id: NCBITAXON:9606, value: Homo sapiens	id: NCBITAXON:9606, value: Homo sapiens	id: NCBITAXON:9606, value: Homo sapiens	id: NCBITAXON:9606, value: Homo sapiens	id: NCBITAXON:9606, value: Homo sapiens	id: NCBITAXON:9606, value: Homo sapiens	id: NCBITAXON:9606, value: Homo sapiens	id: NCBITAXON:9606, value: Homo sapiens	id: NCBITAXON:9606, value: Homo sapiens	id: NCBITAXON:9606, value: Homo sapiens	id: NCBITAXON:9606, value: Homo sapiens	id: NCBITAXON:9606, value: Homo sapiens	id: NCBITAXON:9606, value: Homo sapiens	id: NCBITAXON:9606, value: Homo sapiens	id: NCBITAXON:9606, value: Homo sapiens	id: NCBITAXON:9606, value: Homo sapiens	id: NCBITAXON:9606, value: Homo sapiens	id: NCBITAXON:9606, value: Homo sapiens	id: NCBITAXON:9606, value: Homo sapiens	id: NCBITAXON:9606, value: Homo sapiens	id: NCBITAXON:9606, value: Homo sapiens	id: NCBITAXON:9606, value: Homo sapiens	id: NCBITAXON:9606, value: Homo sapiens	id: NCBITAXON:9606, value: Homo sapiens	id: NCBITAXON:9606, value: Homo sapiens	id: NCBITAXON:9606, value: Homo sapiens	id: NCBITAXON:9606, value: Homo sapiens	id: NCBITAXON:9606, value: Homo sapiens	id: NCBITAXON:9606, value: Homo sapiens	id: NCBITAXON:9606, value: Homo sapiens	id: NCBITAXON:9606, value: Homo sapiens	id: NCBITAXON:9606, value: Homo sapiens	id: NCBITAXON:9606, value: Homo sapiens	id: NCBITAXON:9606, value: Homo sapiens	id: NCBITAXON:9606, value: Homo sapiens	id: NCBITAXON:9606, value: Homo sapiens	id: NCBITAXON:9606, value: Homo sapiens	id: NCBITAXON:9606, value: Homo sapiens	id: NCBITAXON:9606, value: Homo sapiens	id: NCBITAXON:9606, value: Homo sapiens	id: NCBITAXON:9606, value: Homo sapiens	id: NCBITAXON:9606, value: Homo sapiens	id: NCBITAXON:9606, value: Homo sapiens	id: NCBITAXON:9606, value: Homo sapiens	id: NCBITAXON:9606, value: Homo sapiens	id: NCBITAXON:9606, value: Homo sapiens	id: NCBITAXON:9606, value: Homo sapiens	id: NCBITAXON:9606, value: Homo sapiens
single_cell	TRUE	TRUE	TRUE	TRUE	TRUE	TRUE	TRUE	TRUE	TRUE	TRUE	TRUE	TRUE	TRUE	TRUE	TRUE	TRUE	TRUE	TRUE	TRUE	TRUE	TRUE	TRUE	TRUE	TRUE	TRUE	TRUE	TRUE	TRUE	TRUE	TRUE	TRUE	TRUE	TRUE	TRUE	TRUE	TRUE	TRUE	TRUE	TRUE	TRUE	TRUE	TRUE	TRUE	TRUE	TRUE	TRUE	TRUE	TRUE	TRUE
cell_number
cells_per_reaction
cell_storage	TRUE	TRUE	TRUE	TRUE	TRUE	TRUE	TRUE	TRUE	TRUE	TRUE	TRUE	TRUE	TRUE	TRUE	TRUE	TRUE	TRUE	TRUE	TRUE	TRUE	TRUE	TRUE	TRUE	TRUE	TRUE	TRUE	TRUE	TRUE	TRUE	TRUE	TRUE	TRUE	TRUE	TRUE	TRUE	TRUE	TRUE	TRUE	TRUE	TRUE	TRUE	TRUE	TRUE	TRUE	TRUE	TRUE	TRUE	TRUE	TRUE
cell_quality	90% viability	90% viability	90% viability	90% viability	90% viability	90% viability	90% viability	90% viability	90% viability	90% viability	90% viability	90% viability	90% viability	90% viability	90% viability	90% viability	90% viability	90% viability	90% viability	90% viability	90% viability	90% viability	90% viability	90% viability	90% viability	90% viability	90% viability	90% viability	90% viability	90% viability	90% viability	90% viability	90% viability	90% viability	90% viability	90% viability	90% viability	90% viability	90% viability	90% viability	90% viability	90% viability	90% viability	90% viability	90% viability	90% viability	90% viability	90% viability	90% viability
cell_isolation	10x Chromium	10x Chromium	10x Chromium	10x Chromium	10x Chromium	10x Chromium	10x Chromium	10x Chromium	10x Chromium	10x Chromium	10x Chromium	10x Chromium	10x Chromium	10x Chromium	10x Chromium	10x Chromium	10x Chromium	10x Chromium	10x Chromium	10x Chromium	10x Chromium	10x Chromium	10x Chromium	10x Chromium	10x Chromium	10x Chromium	10x Chromium	10x Chromium	10x Chromium	10x Chromium	10x Chromium	10x Chromium	10x Chromium	10x Chromium	10x Chromium	10x Chromium	10x Chromium	10x Chromium	10x Chromium	10x Chromium	10x Chromium	10x Chromium	10x Chromium	10x Chromium	10x Chromium	10x Chromium	10x Chromium	10x Chromium	10x Chromium
cell_processing_protocol	Chromium Next GEM Single Cell V(D)J Reagent Kits v1.1 (10x Genomics)	Chromium Next GEM Single Cell V(D)J Reagent Kits v1.1 (10x Genomics)	Chromium Next GEM Single Cell V(D)J Reagent Kits v1.1 (10x Genomics)	Chromium Next GEM Single Cell V(D)J Reagent Kits v1.1 (10x Genomics)	Chromium Next GEM Single Cell V(D)J Reagent Kits v1.1 (10x Genomics)	Chromium Next GEM Single Cell V(D)J Reagent Kits v1.1 (10x Genomics)	Chromium Next GEM Single Cell V(D)J Reagent Kits v1.1 (10x Genomics)	Chromium Next GEM Single Cell V(D)J Reagent Kits v1.1 (10x Genomics)	Chromium Next GEM Single Cell V(D)J Reagent Kits v1.1 (10x Genomics)	Chromium Next GEM Single Cell V(D)J Reagent Kits v1.1 (10x Genomics)	Chromium Next GEM Single Cell V(D)J Reagent Kits v1.1 (10x Genomics)	Chromium Next GEM Single Cell V(D)J Reagent Kits v1.1 (10x Genomics)	Chromium Next GEM Single Cell V(D)J Reagent Kits v1.1 (10x Genomics)	Chromium Next GEM Single Cell V(D)J Reagent Kits v1.1 (10x Genomics)	Chromium Next GEM Single Cell V(D)J Reagent Kits v1.1 (10x Genomics)	Chromium Next GEM Single Cell V(D)J Reagent Kits v1.1 (10x Genomics)	Chromium Next GEM Single Cell V(D)J Reagent Kits v1.1 (10x Genomics)	Chromium Next GEM Single Cell V(D)J Reagent Kits v1.1 (10x Genomics)	Chromium Next GEM Single Cell V(D)J Reagent Kits v1.1 (10x Genomics)	Chromium Next GEM Single Cell V(D)J Reagent Kits v1.1 (10x Genomics)	Chromium Next GEM Single Cell V(D)J Reagent Kits v1.1 (10x Genomics)	Chromium Next GEM Single Cell V(D)J Reagent Kits v1.1 (10x Genomics)	Chromium Next GEM Single Cell V(D)J Reagent Kits v1.1 (10x Genomics)	Chromium Next GEM Single Cell V(D)J Reagent Kits v1.1 (10x Genomics)	Chromium Next GEM Single Cell V(D)J Reagent Kits v1.1 (10x Genomics)	Chromium Next GEM Single Cell V(D)J Reagent Kits v1.1 (10x Genomics)	Chromium Next GEM Single Cell V(D)J Reagent Kits v1.1 (10x Genomics)	Chromium Next GEM Single Cell V(D)J Reagent Kits v1.1 (10x Genomics)	Chromium Next GEM Single Cell V(D)J Reagent Kits v1.1 (10x Genomics)	Chromium Next GEM Single Cell V(D)J Reagent Kits v1.1 (10x Genomics)	Chromium Next GEM Single Cell V(D)J Reagent Kits v1.1 (10x Genomics)	Chromium Next GEM Single Cell V(D)J Reagent Kits v1.1 (10x Genomics)	Chromium Next GEM Single Cell V(D)J Reagent Kits v1.1 (10x Genomics)	Chromium Next GEM Single Cell V(D)J Reagent Kits v1.1 (10x Genomics)	Chromium Next GEM Single Cell V(D)J Reagent Kits v1.1 (10x Genomics)	Chromium Next GEM Single Cell V(D)J Reagent Kits v1.1 (10x Genomics)	Chromium Next GEM Single Cell V(D)J Reagent Kits v1.1 (10x Genomics)	Chromium Next GEM Single Cell V(D)J Reagent Kits v1.1 (10x Genomics)	Chromium Next GEM Single Cell V(D)J Reagent Kits v1.1 (10x Genomics)	Chromium Next GEM Single Cell V(D)J Reagent Kits v1.1 (10x Genomics)	Chromium Next GEM Single Cell V(D)J Reagent Kits v1.1 (10x Genomics)	Chromium Next GEM Single Cell V(D)J Reagent Kits v1.1 (10x Genomics)	Chromium Next GEM Single Cell V(D)J Reagent Kits v1.1 (10x Genomics)	Chromium Next GEM Single Cell V(D)J Reagent Kits v1.1 (10x Genomics)	Chromium Next GEM Single Cell V(D)J Reagent Kits v1.1 (10x Genomics)	Chromium Next GEM Single Cell V(D)J Reagent Kits v1.1 (10x Genomics)	Chromium Next GEM Single Cell V(D)J Reagent Kits v1.1 (10x Genomics)	Chromium Next GEM Single Cell V(D)J Reagent Kits v1.1 (10x Genomics)	Chromium Next GEM Single Cell V(D)J Reagent Kits v1.1 (10x Genomics)
template_class	RNA	RNA	RNA	RNA	RNA	RNA	RNA	RNA	RNA	RNA	RNA	RNA	RNA	RNA	RNA	RNA	RNA	RNA	RNA	RNA	RNA	RNA	RNA	RNA	RNA	RNA	RNA	RNA	RNA	RNA	RNA	RNA	RNA	RNA	RNA	RNA	RNA	RNA	RNA	RNA	RNA	RNA	RNA	RNA	RNA	RNA	RNA	RNA	RNA
template_quality	NA- RT processed inside GEM	NA- RT processed inside GEM	NA- RT processed inside GEM	NA- RT processed inside GEM	NA- RT processed inside GEM	NA- RT processed inside GEM	NA- RT processed inside GEM	NA- RT processed inside GEM	NA- RT processed inside GEM	NA- RT processed inside GEM	NA- RT processed inside GEM	NA- RT processed inside GEM	NA- RT processed inside GEM	NA- RT processed inside GEM	NA- RT processed inside GEM	NA- RT processed inside GEM	NA- RT processed inside GEM	NA- RT processed inside GEM	NA- RT processed inside GEM	NA- RT processed inside GEM	NA- RT processed inside GEM	NA- RT processed inside GEM	NA- RT processed inside GEM	NA- RT processed inside GEM	NA- RT processed inside GEM	NA- RT processed inside GEM	NA- RT processed inside GEM	NA- RT processed inside GEM	NA- RT processed inside GEM	NA- RT processed inside GEM	NA- RT processed inside GEM	NA- RT processed inside GEM	NA- RT processed inside GEM	NA- RT processed inside GEM	NA- RT processed inside GEM	NA- RT processed inside GEM	NA- RT processed inside GEM	NA- RT processed inside GEM	NA- RT processed inside GEM	NA- RT processed inside GEM	NA- RT processed inside GEM	NA- RT processed inside GEM	NA- RT processed inside GEM	NA- RT processed inside GEM	NA- RT processed inside GEM	NA- RT processed inside GEM	NA- RT processed inside GEM	NA- RT processed inside GEM	NA- RT processed inside GEM
template_amount	17,400 cells loaded for 10,000 cells recovery	17,400 cells loaded for 10,000 cells recovery	17,400 cells loaded for 10,000 cells recovery	17,400 cells loaded for 10,000 cells recovery	17,400 cells loaded for 10,000 cells recovery	17,400 cells loaded for 10,000 cells recovery	17,400 cells loaded for 10,000 cells recovery	17,400 cells loaded for 10,000 cells recovery	17,400 cells loaded for 10,000 cells recovery	17,400 cells loaded for 10,000 cells recovery	17,400 cells loaded for 10,000 cells recovery	17,400 cells loaded for 10,000 cells recovery	17,400 cells loaded for 10,000 cells recovery	17,400 cells loaded for 10,000 cells recovery	17,400 cells loaded for 10,000 cells recovery	17,400 cells loaded for 10,000 cells recovery	17,400 cells loaded for 10,000 cells recovery	17,400 cells loaded for 10,000 cells recovery	17,400 cells loaded for 10,000 cells recovery	17,400 cells loaded for 10,000 cells recovery	17,400 cells loaded for 10,000 cells recovery	17,400 cells loaded for 10,000 cells recovery	17,400 cells loaded for 10,000 cells recovery	17,400 cells loaded for 10,000 cells recovery	17,400 cells loaded for 10,000 cells recovery	17,400 cells loaded for 10,000 cells recovery	17,400 cells loaded for 10,000 cells recovery	17,400 cells loaded for 10,000 cells recovery	17,400 cells loaded for 10,000 cells recovery	17,400 cells loaded for 10,000 cells recovery	17,400 cells loaded for 10,000 cells recovery	17,400 cells loaded for 10,000 cells recovery	17,400 cells loaded for 10,000 cells recovery	17,400 cells loaded for 10,000 cells recovery	17,400 cells loaded for 10,000 cells recovery	17,400 cells loaded for 10,000 cells recovery	17,400 cells loaded for 10,000 cells recovery	17,400 cells loaded for 10,000 cells recovery	17,400 cells loaded for 10,000 cells recovery	17,400 cells loaded for 10,000 cells recovery	17,400 cells loaded for 10,000 cells recovery	17,400 cells loaded for 10,000 cells recovery	17,400 cells loaded for 10,000 cells recovery	17,400 cells loaded for 10,000 cells recovery	17,400 cells loaded for 10,000 cells recovery	17,400 cells loaded for 10,000 cells recovery	17,400 cells loaded for 10,000 cells recovery	17,400 cells loaded for 10,000 cells recovery	17,400 cells loaded for 10,000 cells recovery
library_generation_method	RT(oligo-dT)+TS(UMI)+PCR	RT(oligo-dT)+TS(UMI)+PCR	RT(oligo-dT)+TS(UMI)+PCR	RT(oligo-dT)+TS(UMI)+PCR	RT(oligo-dT)+TS(UMI)+PCR	RT(oligo-dT)+TS(UMI)+PCR	RT(oligo-dT)+TS(UMI)+PCR	RT(oligo-dT)+TS(UMI)+PCR	RT(oligo-dT)+TS(UMI)+PCR	RT(oligo-dT)+TS(UMI)+PCR	RT(oligo-dT)+TS(UMI)+PCR	RT(oligo-dT)+TS(UMI)+PCR	RT(oligo-dT)+TS(UMI)+PCR	RT(oligo-dT)+TS(UMI)+PCR	RT(oligo-dT)+TS(UMI)+PCR	RT(oligo-dT)+TS(UMI)+PCR	RT(oligo-dT)+TS(UMI)+PCR	RT(oligo-dT)+TS(UMI)+PCR	RT(oligo-dT)+TS(UMI)+PCR	RT(oligo-dT)+TS(UMI)+PCR	RT(oligo-dT)+TS(UMI)+PCR	RT(oligo-dT)+TS(UMI)+PCR	RT(oligo-dT)+TS(UMI)+PCR	RT(oligo-dT)+TS(UMI)+PCR	RT(oligo-dT)+TS(UMI)+PCR	RT(oligo-dT)+TS(UMI)+PCR	RT(oligo-dT)+TS(UMI)+PCR	RT(oligo-dT)+TS(UMI)+PCR	RT(oligo-dT)+TS(UMI)+PCR	RT(oligo-dT)+TS(UMI)+PCR	RT(oligo-dT)+TS(UMI)+PCR	RT(oligo-dT)+TS(UMI)+PCR	RT(oligo-dT)+TS(UMI)+PCR	RT(oligo-dT)+TS(UMI)+PCR	RT(oligo-dT)+TS(UMI)+PCR	RT(oligo-dT)+TS(UMI)+PCR	RT(oligo-dT)+TS(UMI)+PCR	RT(oligo-dT)+TS(UMI)+PCR	RT(oligo-dT)+TS(UMI)+PCR	RT(oligo-dT)+TS(UMI)+PCR	RT(oligo-dT)+TS(UMI)+PCR	RT(oligo-dT)+TS(UMI)+PCR	RT(oligo-dT)+TS(UMI)+PCR	RT(oligo-dT)+TS(UMI)+PCR	RT(oligo-dT)+TS(UMI)+PCR	RT(oligo-dT)+TS(UMI)+PCR	RT(oligo-dT)+TS(UMI)+PCR	RT(oligo-dT)+TS(UMI)+PCR	RT(oligo-dT)+TS(UMI)+PCR
library_generation_protocol	cDNA was generated using	cDNA was generated using	cDNA was generated using	cDNA was generated using	cDNA was generated using	cDNA was generated using	cDNA was generated using	cDNA was generated using	cDNA was generated using	cDNA was generated using	cDNA was generated using	cDNA was generated using	cDNA was generated using	cDNA was generated using	cDNA was generated using	cDNA was generated using	cDNA was generated using	cDNA was generated using	cDNA was generated using	cDNA was generated using	cDNA was generated using	cDNA was generated using	cDNA was generated using	cDNA was generated using	cDNA was generated using	cDNA was generated using	cDNA was generated using	cDNA was generated using	cDNA was generated using	cDNA was generated using	cDNA was generated using	cDNA was generated using	cDNA was generated using	cDNA was generated using	cDNA was generated using	cDNA was generated using	cDNA was generated using	cDNA was generated using	cDNA was generated using	cDNA was generated using	cDNA was generated using	cDNA was generated using	cDNA was generated using	cDNA was generated using	cDNA was generated using	cDNA was generated using	cDNA was generated using	cDNA was generated using	cDNA was generated using
library_generation_kit_version	Chromium Next GEM Single Cell V(D)J Reagent Kits v1.1 (10x Genomics)	Chromium Next GEM Single Cell V(D)J Reagent Kits v1.1 (10x Genomics)	Chromium Next GEM Single Cell V(D)J Reagent Kits v1.1 (10x Genomics)	Chromium Next GEM Single Cell V(D)J Reagent Kits v1.1 (10x Genomics)	Chromium Next GEM Single Cell V(D)J Reagent Kits v1.1 (10x Genomics)	Chromium Next GEM Single Cell V(D)J Reagent Kits v1.1 (10x Genomics)	Chromium Next GEM Single Cell V(D)J Reagent Kits v1.1 (10x Genomics)	Chromium Next GEM Single Cell V(D)J Reagent Kits v1.1 (10x Genomics)	Chromium Next GEM Single Cell V(D)J Reagent Kits v1.1 (10x Genomics)	Chromium Next GEM Single Cell V(D)J Reagent Kits v1.1 (10x Genomics)	Chromium Next GEM Single Cell V(D)J Reagent Kits v1.1 (10x Genomics)	Chromium Next GEM Single Cell V(D)J Reagent Kits v1.1 (10x Genomics)	Chromium Next GEM Single Cell V(D)J Reagent Kits v1.1 (10x Genomics)	Chromium Next GEM Single Cell V(D)J Reagent Kits v1.1 (10x Genomics)	Chromium Next GEM Single Cell V(D)J Reagent Kits v1.1 (10x Genomics)	Chromium Next GEM Single Cell V(D)J Reagent Kits v1.1 (10x Genomics)	Chromium Next GEM Single Cell V(D)J Reagent Kits v1.1 (10x Genomics)	Chromium Next GEM Single Cell V(D)J Reagent Kits v1.1 (10x Genomics)	Chromium Next GEM Single Cell V(D)J Reagent Kits v1.1 (10x Genomics)	Chromium Next GEM Single Cell V(D)J Reagent Kits v1.1 (10x Genomics)	Chromium Next GEM Single Cell V(D)J Reagent Kits v1.1 (10x Genomics)	Chromium Next GEM Single Cell V(D)J Reagent Kits v1.1 (10x Genomics)	Chromium Next GEM Single Cell V(D)J Reagent Kits v1.1 (10x Genomics)	Chromium Next GEM Single Cell V(D)J Reagent Kits v1.1 (10x Genomics)	Chromium Next GEM Single Cell V(D)J Reagent Kits v1.1 (10x Genomics)	Chromium Next GEM Single Cell V(D)J Reagent Kits v1.1 (10x Genomics)	Chromium Next GEM Single Cell V(D)J Reagent Kits v1.1 (10x Genomics)	Chromium Next GEM Single Cell V(D)J Reagent Kits v1.1 (10x Genomics)	Chromium Next GEM Single Cell V(D)J Reagent Kits v1.1 (10x Genomics)	Chromium Next GEM Single Cell V(D)J Reagent Kits v1.1 (10x Genomics)	Chromium Next GEM Single Cell V(D)J Reagent Kits v1.1 (10x Genomics)	Chromium Next GEM Single Cell V(D)J Reagent Kits v1.1 (10x Genomics)	Chromium Next GEM Single Cell V(D)J Reagent Kits v1.1 (10x Genomics)	Chromium Next GEM Single Cell V(D)J Reagent Kits v1.1 (10x Genomics)	Chromium Next GEM Single Cell V(D)J Reagent Kits v1.1 (10x Genomics)	Chromium Next GEM Single Cell V(D)J Reagent Kits v1.1 (10x Genomics)	Chromium Next GEM Single Cell V(D)J Reagent Kits v1.1 (10x Genomics)	Chromium Next GEM Single Cell V(D)J Reagent Kits v1.1 (10x Genomics)	Chromium Next GEM Single Cell V(D)J Reagent Kits v1.1 (10x Genomics)	Chromium Next GEM Single Cell V(D)J Reagent Kits v1.1 (10x Genomics)	Chromium Next GEM Single Cell V(D)J Reagent Kits v1.1 (10x Genomics)	Chromium Next GEM Single Cell V(D)J Reagent Kits v1.1 (10x Genomics)	Chromium Next GEM Single Cell V(D)J Reagent Kits v1.1 (10x Genomics)	Chromium Next GEM Single Cell V(D)J Reagent Kits v1.1 (10x Genomics)	Chromium Next GEM Single Cell V(D)J Reagent Kits v1.1 (10x Genomics)	Chromium Next GEM Single Cell V(D)J Reagent Kits v1.1 (10x Genomics)	Chromium Next GEM Single Cell V(D)J Reagent Kits v1.1 (10x Genomics)	Chromium Next GEM Single Cell V(D)J Reagent Kits v1.1 (10x Genomics)	Chromium Next GEM Single Cell V(D)J Reagent Kits v1.1 (10x Genomics)
complete_sequences	mixed	mixed	mixed	mixed	mixed	mixed	mixed	mixed	mixed	mixed	mixed	mixed	mixed	mixed	mixed	mixed	mixed	mixed	mixed	mixed	mixed	mixed	mixed	mixed	mixed	mixed	mixed	mixed	mixed	mixed	mixed	mixed	mixed	mixed	mixed	mixed	mixed	mixed	mixed	mixed	mixed	mixed	mixed	mixed	mixed	mixed	mixed	mixed	mixed
physical_linkage	hetero_head-head	hetero_head-head	hetero_head-head	hetero_head-head	hetero_head-head	hetero_head-head	hetero_head-head	hetero_head-head	hetero_head-head	hetero_head-head	hetero_head-head	hetero_head-head	hetero_head-head	hetero_head-head	hetero_head-head	hetero_head-head	hetero_head-head	hetero_head-head	hetero_head-head	hetero_head-head	hetero_head-head	hetero_head-head	hetero_head-head	hetero_head-head	hetero_head-head	hetero_head-head	hetero_head-head	hetero_head-head	hetero_head-head	hetero_head-head	hetero_head-head	hetero_head-head	hetero_head-head	hetero_head-head	hetero_head-head	hetero_head-head	hetero_head-head	hetero_head-head	hetero_head-head	hetero_head-head	hetero_head-head	hetero_head-head	hetero_head-head	hetero_head-head	hetero_head-head	hetero_head-head	hetero_head-head	hetero_head-head	hetero_head-head
pcr_target_locus
forward_pcr_primer_target_location
reverse_pcr_primer_target_location
sequencing_run_id
total_reads_passing_qc_filter	138907325	138907325	138907325	138907325	138907325	138907325	138907325	138907325	138907325	138907325	138907325	138907325	138907325	138907325	138907325	138907325	138907325	138907325	138907325	138907325	138907325	138907325	138907325	138907325	138907325	138907325	138907325	138907325	138907325	138907325	138907325	138907325	138907325	138907325	138907325	138907325	138907325	138907325	138907325	138907325	138907325	138907325	138907325	138907325	138907325	138907325	138907325	138907325	138907325
sequencing_platform	Novaseq 6000, illumina	Novaseq 6000, illumina	Novaseq 6000, illumina	Novaseq 6000, illumina	Novaseq 6000, illumina	Novaseq 6000, illumina	Novaseq 6000, illumina	Novaseq 6000, illumina	Novaseq 6000, illumina	Novaseq 6000, illumina	Novaseq 6000, illumina	Novaseq 6000, illumina	Novaseq 6000, illumina	Novaseq 6000, illumina	Novaseq 6000, illumina	Novaseq 6000, illumina	Novaseq 6000, illumina	Novaseq 6000, illumina	Novaseq 6000, illumina	Novaseq 6000, illumina	Novaseq 6000, illumina	Novaseq 6000, illumina	Novaseq 6000, illumina	Novaseq 6000, illumina	Novaseq 6000, illumina	Novaseq 6000, illumina	Novaseq 6000, illumina	Novaseq 6000, illumina	Novaseq 6000, illumina	Novaseq 6000, illumina	Novaseq 6000, illumina	Novaseq 6000, illumina	Novaseq 6000, illumina	Novaseq 6000, illumina	Novaseq 6000, illumina	Novaseq 6000, illumina	Novaseq 6000, illumina	Novaseq 6000, illumina	Novaseq 6000, illumina	Novaseq 6000, illumina	Novaseq 6000, illumina	Novaseq 6000, illumina	Novaseq 6000, illumina	Novaseq 6000, illumina	Novaseq 6000, illumina	Novaseq 6000, illumina	Novaseq 6000, illumina	Novaseq 6000, illumina	Novaseq 6000, illumina
sequencing_facility	Department of Computational Biology and Medical Sciences, Graduate School of Frontier Sciences, The University of Tokyo	Department of Computational Biology and Medical Sciences, Graduate School of Frontier Sciences, The University of Tokyo	Department of Computational Biology and Medical Sciences, Graduate School of Frontier Sciences, The University of Tokyo	Department of Computational Biology and Medical Sciences, Graduate School of Frontier Sciences, The University of Tokyo	Department of Computational Biology and Medical Sciences, Graduate School of Frontier Sciences, The University of Tokyo	Department of Computational Biology and Medical Sciences, Graduate School of Frontier Sciences, The University of Tokyo	Department of Computational Biology and Medical Sciences, Graduate School of Frontier Sciences, The University of Tokyo	Department of Computational Biology and Medical Sciences, Graduate School of Frontier Sciences, The University of Tokyo	Department of Computational Biology and Medical Sciences, Graduate School of Frontier Sciences, The University of Tokyo	Department of Computational Biology and Medical Sciences, Graduate School of Frontier Sciences, The University of Tokyo	Department of Computational Biology and Medical Sciences, Graduate School of Frontier Sciences, The University of Tokyo	Department of Computational Biology and Medical Sciences, Graduate School of Frontier Sciences, The University of Tokyo	Department of Computational Biology and Medical Sciences, Graduate School of Frontier Sciences, The University of Tokyo	Department of Computational Biology and Medical Sciences, Graduate School of Frontier Sciences, The University of Tokyo	Department of Computational Biology and Medical Sciences, Graduate School of Frontier Sciences, The University of Tokyo	Department of Computational Biology and Medical Sciences, Graduate School of Frontier Sciences, The University of Tokyo	Department of Computational Biology and Medical Sciences, Graduate School of Frontier Sciences, The University of Tokyo	Department of Computational Biology and Medical Sciences, Graduate School of Frontier Sciences, The University of Tokyo	Department of Computational Biology and Medical Sciences, Graduate School of Frontier Sciences, The University of Tokyo	Department of Computational Biology and Medical Sciences, Graduate School of Frontier Sciences, The University of Tokyo	Department of Computational Biology and Medical Sciences, Graduate School of Frontier Sciences, The University of Tokyo	Department of Computational Biology and Medical Sciences, Graduate School of Frontier Sciences, The University of Tokyo	Department of Computational Biology and Medical Sciences, Graduate School of Frontier Sciences, The University of Tokyo	Department of Computational Biology and Medical Sciences, Graduate School of Frontier Sciences, The University of Tokyo	Department of Computational Biology and Medical Sciences, Graduate School of Frontier Sciences, The University of Tokyo	Department of Computational Biology and Medical Sciences, Graduate School of Frontier Sciences, The University of Tokyo	Department of Computational Biology and Medical Sciences, Graduate School of Frontier Sciences, The University of Tokyo	Department of Computational Biology and Medical Sciences, Graduate School of Frontier Sciences, The University of Tokyo	Department of Computational Biology and Medical Sciences, Graduate School of Frontier Sciences, The University of Tokyo	Department of Computational Biology and Medical Sciences, Graduate School of Frontier Sciences, The University of Tokyo	Department of Computational Biology and Medical Sciences, Graduate School of Frontier Sciences, The University of Tokyo	Department of Computational Biology and Medical Sciences, Graduate School of Frontier Sciences, The University of Tokyo	Department of Computational Biology and Medical Sciences, Graduate School of Frontier Sciences, The University of Tokyo	Department of Computational Biology and Medical Sciences, Graduate School of Frontier Sciences, The University of Tokyo	Department of Computational Biology and Medical Sciences, Graduate School of Frontier Sciences, The University of Tokyo	Department of Computational Biology and Medical Sciences, Graduate School of Frontier Sciences, The University of Tokyo	Department of Computational Biology and Medical Sciences, Graduate School of Frontier Sciences, The University of Tokyo	Department of Computational Biology and Medical Sciences, Graduate School of Frontier Sciences, The University of Tokyo	Department of Computational Biology and Medical Sciences, Graduate School of Frontier Sciences, The University of Tokyo	Department of Computational Biology and Medical Sciences, Graduate School of Frontier Sciences, The University of Tokyo	Department of Computational Biology and Medical Sciences, Graduate School of Frontier Sciences, The University of Tokyo	Department of Computational Biology and Medical Sciences, Graduate School of Frontier Sciences, The University of Tokyo	Department of Computational Biology and Medical Sciences, Graduate School of Frontier Sciences, The University of Tokyo	Department of Computational Biology and Medical Sciences, Graduate School of Frontier Sciences, The University of Tokyo	Department of Computational Biology and Medical Sciences, Graduate School of Frontier Sciences, The University of Tokyo	Department of Computational Biology and Medical Sciences, Graduate School of Frontier Sciences, The University of Tokyo	Department of Computational Biology and Medical Sciences, Graduate School of Frontier Sciences, The University of Tokyo	Department of Computational Biology and Medical Sciences, Graduate School of Frontier Sciences, The University of Tokyo	Department of Computational Biology and Medical Sciences, Graduate School of Frontier Sciences, The University of Tokyo
sequencing_run_date	2020/5/29-2021/6/30	2020/5/29-2021/6/30	2020/5/29-2021/6/30	2020/5/29-2021/6/30	2020/5/29-2021/6/30	2020/5/29-2021/6/30	2020/5/29-2021/6/30	2020/5/29-2021/6/30	2020/5/29-2021/6/30	2020/5/29-2021/6/30	2020/5/29-2021/6/30	2020/5/29-2021/6/30	2020/5/29-2021/6/30	2020/5/29-2021/6/30	2020/5/29-2021/6/30	2020/5/29-2021/6/30	2020/5/29-2021/6/30	2020/5/29-2021/6/30	2020/5/29-2021/6/30	2020/5/29-2021/6/30	2020/5/29-2021/6/30	2020/5/29-2021/6/30	2020/5/29-2021/6/30	2020/5/29-2021/6/30	2020/5/29-2021/6/30	2020/5/29-2021/6/30	2020/5/29-2021/6/30	2020/5/29-2021/6/30	2020/5/29-2021/6/30	2020/5/29-2021/6/30	2020/5/29-2021/6/30	2020/5/29-2021/6/30	2020/5/29-2021/6/30	2020/5/29-2021/6/30	2020/5/29-2021/6/30	2020/5/29-2021/6/30	2020/5/29-2021/6/30	2020/5/29-2021/6/30	2020/5/29-2021/6/30	2020/5/29-2021/6/30	2020/5/29-2021/6/30	2020/5/29-2021/6/30	2020/5/29-2021/6/30	2020/5/29-2021/6/30	2020/5/29-2021/6/30	2020/5/29-2021/6/30	2020/5/29-2021/6/30	2020/5/29-2021/6/30	2020/5/29-2021/6/30
sequencing_kit	NovaSeq 6000 Reagent Kit v1.5 (300 cycles)	NovaSeq 6000 Reagent Kit v1.5 (300 cycles)	NovaSeq 6000 Reagent Kit v1.5 (300 cycles)	NovaSeq 6000 Reagent Kit v1.5 (300 cycles)	NovaSeq 6000 Reagent Kit v1.5 (300 cycles)	NovaSeq 6000 Reagent Kit v1.5 (300 cycles)	NovaSeq 6000 Reagent Kit v1.5 (300 cycles)	NovaSeq 6000 Reagent Kit v1.5 (300 cycles)	NovaSeq 6000 Reagent Kit v1.5 (300 cycles)	NovaSeq 6000 Reagent Kit v1.5 (300 cycles)	NovaSeq 6000 Reagent Kit v1.5 (300 cycles)	NovaSeq 6000 Reagent Kit v1.5 (300 cycles)	NovaSeq 6000 Reagent Kit v1.5 (300 cycles)	NovaSeq 6000 Reagent Kit v1.5 (300 cycles)	NovaSeq 6000 Reagent Kit v1.5 (300 cycles)	NovaSeq 6000 Reagent Kit v1.5 (300 cycles)	NovaSeq 6000 Reagent Kit v1.5 (300 cycles)	NovaSeq 6000 Reagent Kit v1.5 (300 cycles)	NovaSeq 6000 Reagent Kit v1.5 (300 cycles)	NovaSeq 6000 Reagent Kit v1.5 (300 cycles)	NovaSeq 6000 Reagent Kit v1.5 (300 cycles)	NovaSeq 6000 Reagent Kit v1.5 (300 cycles)	NovaSeq 6000 Reagent Kit v1.5 (300 cycles)	NovaSeq 6000 Reagent Kit v1.5 (300 cycles)	NovaSeq 6000 Reagent Kit v1.5 (300 cycles)	NovaSeq 6000 Reagent Kit v1.5 (300 cycles)	NovaSeq 6000 Reagent Kit v1.5 (300 cycles)	NovaSeq 6000 Reagent Kit v1.5 (300 cycles)	NovaSeq 6000 Reagent Kit v1.5 (300 cycles)	NovaSeq 6000 Reagent Kit v1.5 (300 cycles)	NovaSeq 6000 Reagent Kit v1.5 (300 cycles)	NovaSeq 6000 Reagent Kit v1.5 (300 cycles)	NovaSeq 6000 Reagent Kit v1.5 (300 cycles)	NovaSeq 6000 Reagent Kit v1.5 (300 cycles)	NovaSeq 6000 Reagent Kit v1.5 (300 cycles)	NovaSeq 6000 Reagent Kit v1.5 (300 cycles)	NovaSeq 6000 Reagent Kit v1.5 (300 cycles)	NovaSeq 6000 Reagent Kit v1.5 (300 cycles)	NovaSeq 6000 Reagent Kit v1.5 (300 cycles)	NovaSeq 6000 Reagent Kit v1.5 (300 cycles)	NovaSeq 6000 Reagent Kit v1.5 (300 cycles)	NovaSeq 6000 Reagent Kit v1.5 (300 cycles)	NovaSeq 6000 Reagent Kit v1.5 (300 cycles)	NovaSeq 6000 Reagent Kit v1.5 (300 cycles)	NovaSeq 6000 Reagent Kit v1.5 (300 cycles)	NovaSeq 6000 Reagent Kit v1.5 (300 cycles)	NovaSeq 6000 Reagent Kit v1.5 (300 cycles)	NovaSeq 6000 Reagent Kit v1.5 (300 cycles)	NovaSeq 6000 Reagent Kit v1.5 (300 cycles)
file_type	fastq	fastq	fastq	fastq	fastq	fastq	fastq	fastq	fastq	fastq	fastq	fastq	fastq	fastq	fastq	fastq	fastq	fastq	fastq	fastq	fastq	fastq	fastq	fastq	fastq	fastq	fastq	fastq	fastq	fastq	fastq	fastq	fastq	fastq	fastq	fastq	fastq	fastq	fastq	fastq	fastq	fastq	fastq	fastq	fastq	fastq	fastq	fastq	fastq
filename
read_direction	forward	forward	forward	forward	forward	forward	forward	forward	forward	forward	forward	forward	forward	forward	forward	forward	forward	forward	forward	forward	forward	forward	forward	forward	forward	forward	forward	forward	forward	forward	forward	forward	forward	forward	forward	forward	forward	forward	forward	forward	forward	forward	forward	forward	forward	forward	forward	forward	forward
read_length	98	98	98	98	98	98	98	98	98	98	98	98	98	98	98	98	98	98	98	98	98	98	98	98	98	98	98	98	98	98	98	98	98	98	98	98	98	98	98	98	98	98	98	98	98	98	98	98	98
paired_filename	NULL-LIKE	NULL-LIKE	NULL-LIKE	NULL-LIKE	NULL-LIKE	NULL-LIKE	NULL-LIKE	NULL-LIKE	NULL-LIKE	NULL-LIKE	NULL-LIKE	NULL-LIKE	NULL-LIKE	NULL-LIKE	NULL-LIKE	NULL-LIKE	NULL-LIKE	NULL-LIKE	NULL-LIKE	NULL-LIKE	NULL-LIKE	NULL-LIKE	NULL-LIKE	NULL-LIKE	NULL-LIKE	NULL-LIKE	NULL-LIKE	NULL-LIKE	NULL-LIKE	NULL-LIKE	NULL-LIKE	NULL-LIKE	NULL-LIKE	NULL-LIKE	NULL-LIKE	NULL-LIKE	NULL-LIKE	NULL-LIKE	NULL-LIKE	NULL-LIKE	NULL-LIKE	NULL-LIKE	NULL-LIKE	NULL-LIKE	NULL-LIKE	NULL-LIKE	NULL-LIKE	NULL-LIKE	NULL-LIKE
paired_read_direction	NULL-LIKE	NULL-LIKE	NULL-LIKE	NULL-LIKE	NULL-LIKE	NULL-LIKE	NULL-LIKE	NULL-LIKE	NULL-LIKE	NULL-LIKE	NULL-LIKE	NULL-LIKE	NULL-LIKE	NULL-LIKE	NULL-LIKE	NULL-LIKE	NULL-LIKE	NULL-LIKE	NULL-LIKE	NULL-LIKE	NULL-LIKE	NULL-LIKE	NULL-LIKE	NULL-LIKE	NULL-LIKE	NULL-LIKE	NULL-LIKE	NULL-LIKE	NULL-LIKE	NULL-LIKE	NULL-LIKE	NULL-LIKE	NULL-LIKE	NULL-LIKE	NULL-LIKE	NULL-LIKE	NULL-LIKE	NULL-LIKE	NULL-LIKE	NULL-LIKE	NULL-LIKE	NULL-LIKE	NULL-LIKE	NULL-LIKE	NULL-LIKE	NULL-LIKE	NULL-LIKE	NULL-LIKE	NULL-LIKE
paired_read_length	NULL-LIKE	NULL-LIKE	NULL-LIKE	NULL-LIKE	NULL-LIKE	NULL-LIKE	NULL-LIKE	NULL-LIKE	NULL-LIKE	NULL-LIKE	NULL-LIKE	NULL-LIKE	NULL-LIKE	NULL-LIKE	NULL-LIKE	NULL-LIKE	NULL-LIKE	NULL-LIKE	NULL-LIKE	NULL-LIKE	NULL-LIKE	NULL-LIKE	NULL-LIKE	NULL-LIKE	NULL-LIKE	NULL-LIKE	NULL-LIKE	NULL-LIKE	NULL-LIKE	NULL-LIKE	NULL-LIKE	NULL-LIKE	NULL-LIKE	NULL-LIKE	NULL-LIKE	NULL-LIKE	NULL-LIKE	NULL-LIKE	NULL-LIKE	NULL-LIKE	NULL-LIKE	NULL-LIKE	NULL-LIKE	NULL-LIKE	NULL-LIKE	NULL-LIKE	NULL-LIKE	NULL-LIKE	NULL-LIKE
software_versions	Cellranger(v3.1.0 )	Cellranger(v3.1.0 )	Cellranger(v3.1.0 )	Cellranger(v3.1.0 )	Cellranger(v3.1.0 )	Cellranger(v3.1.0 )	Cellranger(v3.1.0 )	Cellranger(v3.1.0 )	Cellranger(v3.1.0 )	Cellranger(v3.1.0 )	Cellranger(v3.1.0 )	Cellranger(v3.1.0 )	Cellranger(v3.1.0 )	Cellranger(v3.1.0 )	Cellranger(v3.1.0 )	Cellranger(v3.1.0 )	Cellranger(v3.1.0 )	Cellranger(v3.1.0 )	Cellranger(v3.1.0 )	Cellranger(v3.1.0 )	Cellranger(v3.1.0 )	Cellranger(v3.1.0 )	Cellranger(v3.1.0 )	Cellranger(v3.1.0 )	Cellranger(v3.1.0 )	Cellranger(v3.1.0 )	Cellranger(v3.1.0 )	Cellranger(v3.1.0 )	Cellranger(v3.1.0 )	Cellranger(v3.1.0 )	Cellranger(v3.1.0 )	Cellranger(v3.1.0 )	Cellranger(v3.1.0 )	Cellranger(v3.1.0 )	Cellranger(v3.1.0 )	Cellranger(v3.1.0 )	Cellranger(v3.1.0 )	Cellranger(v3.1.0 )	Cellranger(v3.1.0 )	Cellranger(v3.1.0 )	Cellranger(v3.1.0 )	Cellranger(v3.1.0 )	Cellranger(v3.1.0 )	Cellranger(v3.1.0 )	Cellranger(v3.1.0 )	Cellranger(v3.1.0 )	Cellranger(v3.1.0 )	Cellranger(v3.1.0 )	Cellranger(v3.1.0 )
paired_reads_assembly	Cellranger(v3.1.0 )	Cellranger(v3.1.0 )	Cellranger(v3.1.0 )	Cellranger(v3.1.0 )	Cellranger(v3.1.0 )	Cellranger(v3.1.0 )	Cellranger(v3.1.0 )	Cellranger(v3.1.0 )	Cellranger(v3.1.0 )	Cellranger(v3.1.0 )	Cellranger(v3.1.0 )	Cellranger(v3.1.0 )	Cellranger(v3.1.0 )	Cellranger(v3.1.0 )	Cellranger(v3.1.0 )	Cellranger(v3.1.0 )	Cellranger(v3.1.0 )	Cellranger(v3.1.0 )	Cellranger(v3.1.0 )	Cellranger(v3.1.0 )	Cellranger(v3.1.0 )	Cellranger(v3.1.0 )	Cellranger(v3.1.0 )	Cellranger(v3.1.0 )	Cellranger(v3.1.0 )	Cellranger(v3.1.0 )	Cellranger(v3.1.0 )	Cellranger(v3.1.0 )	Cellranger(v3.1.0 )	Cellranger(v3.1.0 )	Cellranger(v3.1.0 )	Cellranger(v3.1.0 )	Cellranger(v3.1.0 )	Cellranger(v3.1.0 )	Cellranger(v3.1.0 )	Cellranger(v3.1.0 )	Cellranger(v3.1.0 )	Cellranger(v3.1.0 )	Cellranger(v3.1.0 )	Cellranger(v3.1.0 )	Cellranger(v3.1.0 )	Cellranger(v3.1.0 )	Cellranger(v3.1.0 )	Cellranger(v3.1.0 )	Cellranger(v3.1.0 )	Cellranger(v3.1.0 )	Cellranger(v3.1.0 )	Cellranger(v3.1.0 )	Cellranger(v3.1.0 )
quality_thresholds	Cellranger(v3.1.0 ) default	Cellranger(v3.1.0 ) default	Cellranger(v3.1.0 ) default	Cellranger(v3.1.0 ) default	Cellranger(v3.1.0 ) default	Cellranger(v3.1.0 ) default	Cellranger(v3.1.0 ) default	Cellranger(v3.1.0 ) default	Cellranger(v3.1.0 ) default	Cellranger(v3.1.0 ) default	Cellranger(v3.1.0 ) default	Cellranger(v3.1.0 ) default	Cellranger(v3.1.0 ) default	Cellranger(v3.1.0 ) default	Cellranger(v3.1.0 ) default	Cellranger(v3.1.0 ) default	Cellranger(v3.1.0 ) default	Cellranger(v3.1.0 ) default	Cellranger(v3.1.0 ) default	Cellranger(v3.1.0 ) default	Cellranger(v3.1.0 ) default	Cellranger(v3.1.0 ) default	Cellranger(v3.1.0 ) default	Cellranger(v3.1.0 ) default	Cellranger(v3.1.0 ) default	Cellranger(v3.1.0 ) default	Cellranger(v3.1.0 ) default	Cellranger(v3.1.0 ) default	Cellranger(v3.1.0 ) default	Cellranger(v3.1.0 ) default	Cellranger(v3.1.0 ) default	Cellranger(v3.1.0 ) default	Cellranger(v3.1.0 ) default	Cellranger(v3.1.0 ) default	Cellranger(v3.1.0 ) default	Cellranger(v3.1.0 ) default	Cellranger(v3.1.0 ) default	Cellranger(v3.1.0 ) default	Cellranger(v3.1.0 ) default	Cellranger(v3.1.0 ) default	Cellranger(v3.1.0 ) default	Cellranger(v3.1.0 ) default	Cellranger(v3.1.0 ) default	Cellranger(v3.1.0 ) default	Cellranger(v3.1.0 ) default	Cellranger(v3.1.0 ) default	Cellranger(v3.1.0 ) default	Cellranger(v3.1.0 ) default	Cellranger(v3.1.0 ) default
primer_match_cutoffs	Cellranger(v3.1.0 ) default	Cellranger(v3.1.0 ) default	Cellranger(v3.1.0 ) default	Cellranger(v3.1.0 ) default	Cellranger(v3.1.0 ) default	Cellranger(v3.1.0 ) default	Cellranger(v3.1.0 ) default	Cellranger(v3.1.0 ) default	Cellranger(v3.1.0 ) default	Cellranger(v3.1.0 ) default	Cellranger(v3.1.0 ) default	Cellranger(v3.1.0 ) default	Cellranger(v3.1.0 ) default	Cellranger(v3.1.0 ) default	Cellranger(v3.1.0 ) default	Cellranger(v3.1.0 ) default	Cellranger(v3.1.0 ) default	Cellranger(v3.1.0 ) default	Cellranger(v3.1.0 ) default	Cellranger(v3.1.0 ) default	Cellranger(v3.1.0 ) default	Cellranger(v3.1.0 ) default	Cellranger(v3.1.0 ) default	Cellranger(v3.1.0 ) default	Cellranger(v3.1.0 ) default	Cellranger(v3.1.0 ) default	Cellranger(v3.1.0 ) default	Cellranger(v3.1.0 ) default	Cellranger(v3.1.0 ) default	Cellranger(v3.1.0 ) default	Cellranger(v3.1.0 ) default	Cellranger(v3.1.0 ) default	Cellranger(v3.1.0 ) default	Cellranger(v3.1.0 ) default	Cellranger(v3.1.0 ) default	Cellranger(v3.1.0 ) default	Cellranger(v3.1.0 ) default	Cellranger(v3.1.0 ) default	Cellranger(v3.1.0 ) default	Cellranger(v3.1.0 ) default	Cellranger(v3.1.0 ) default	Cellranger(v3.1.0 ) default	Cellranger(v3.1.0 ) default	Cellranger(v3.1.0 ) default	Cellranger(v3.1.0 ) default	Cellranger(v3.1.0 ) default	Cellranger(v3.1.0 ) default	Cellranger(v3.1.0 ) default	Cellranger(v3.1.0 ) default
collapsing_method	Cellranger(v3.1.0 )	Cellranger(v3.1.0 )	Cellranger(v3.1.0 )	Cellranger(v3.1.0 )	Cellranger(v3.1.0 )	Cellranger(v3.1.0 )	Cellranger(v3.1.0 )	Cellranger(v3.1.0 )	Cellranger(v3.1.0 )	Cellranger(v3.1.0 )	Cellranger(v3.1.0 )	Cellranger(v3.1.0 )	Cellranger(v3.1.0 )	Cellranger(v3.1.0 )	Cellranger(v3.1.0 )	Cellranger(v3.1.0 )	Cellranger(v3.1.0 )	Cellranger(v3.1.0 )	Cellranger(v3.1.0 )	Cellranger(v3.1.0 )	Cellranger(v3.1.0 )	Cellranger(v3.1.0 )	Cellranger(v3.1.0 )	Cellranger(v3.1.0 )	Cellranger(v3.1.0 )	Cellranger(v3.1.0 )	Cellranger(v3.1.0 )	Cellranger(v3.1.0 )	Cellranger(v3.1.0 )	Cellranger(v3.1.0 )	Cellranger(v3.1.0 )	Cellranger(v3.1.0 )	Cellranger(v3.1.0 )	Cellranger(v3.1.0 )	Cellranger(v3.1.0 )	Cellranger(v3.1.0 )	Cellranger(v3.1.0 )	Cellranger(v3.1.0 )	Cellranger(v3.1.0 )	Cellranger(v3.1.0 )	Cellranger(v3.1.0 )	Cellranger(v3.1.0 )	Cellranger(v3.1.0 )	Cellranger(v3.1.0 )	Cellranger(v3.1.0 )	Cellranger(v3.1.0 )	Cellranger(v3.1.0 )	Cellranger(v3.1.0 )	Cellranger(v3.1.0 )
data_processing_protocols	Cellranger(v3.1.0 )	Cellranger(v3.1.0 )	Cellranger(v3.1.0 )	Cellranger(v3.1.0 )	Cellranger(v3.1.0 )	Cellranger(v3.1.0 )	Cellranger(v3.1.0 )	Cellranger(v3.1.0 )	Cellranger(v3.1.0 )	Cellranger(v3.1.0 )	Cellranger(v3.1.0 )	Cellranger(v3.1.0 )	Cellranger(v3.1.0 )	Cellranger(v3.1.0 )	Cellranger(v3.1.0 )	Cellranger(v3.1.0 )	Cellranger(v3.1.0 )	Cellranger(v3.1.0 )	Cellranger(v3.1.0 )	Cellranger(v3.1.0 )	Cellranger(v3.1.0 )	Cellranger(v3.1.0 )	Cellranger(v3.1.0 )	Cellranger(v3.1.0 )	Cellranger(v3.1.0 )	Cellranger(v3.1.0 )	Cellranger(v3.1.0 )	Cellranger(v3.1.0 )	Cellranger(v3.1.0 )	Cellranger(v3.1.0 )	Cellranger(v3.1.0 )	Cellranger(v3.1.0 )	Cellranger(v3.1.0 )	Cellranger(v3.1.0 )	Cellranger(v3.1.0 )	Cellranger(v3.1.0 )	Cellranger(v3.1.0 )	Cellranger(v3.1.0 )	Cellranger(v3.1.0 )	Cellranger(v3.1.0 )	Cellranger(v3.1.0 )	Cellranger(v3.1.0 )	Cellranger(v3.1.0 )	Cellranger(v3.1.0 )	Cellranger(v3.1.0 )	Cellranger(v3.1.0 )	Cellranger(v3.1.0 )	Cellranger(v3.1.0 )	Cellranger(v3.1.0 )
germline_database	GRCh38 Reference - 5.0.0	GRCh38 Reference - 5.0.0	GRCh38 Reference - 5.0.0	GRCh38 Reference - 5.0.0	GRCh38 Reference - 5.0.0	GRCh38 Reference - 5.0.0	GRCh38 Reference - 5.0.0	GRCh38 Reference - 5.0.0	GRCh38 Reference - 5.0.0	GRCh38 Reference - 5.0.0	GRCh38 Reference - 5.0.0	GRCh38 Reference - 5.0.0	GRCh38 Reference - 5.0.0	GRCh38 Reference - 5.0.0	GRCh38 Reference - 5.0.0	GRCh38 Reference - 5.0.0	GRCh38 Reference - 5.0.0	GRCh38 Reference - 5.0.0	GRCh38 Reference - 5.0.0	GRCh38 Reference - 5.0.0	GRCh38 Reference - 5.0.0	GRCh38 Reference - 5.0.0	GRCh38 Reference - 5.0.0	GRCh38 Reference - 5.0.0	GRCh38 Reference - 5.0.0	GRCh38 Reference - 5.0.0	GRCh38 Reference - 5.0.0	GRCh38 Reference - 5.0.0	GRCh38 Reference - 5.0.0	GRCh38 Reference - 5.0.0	GRCh38 Reference - 5.0.0	GRCh38 Reference - 5.0.0	GRCh38 Reference - 5.0.0	GRCh38 Reference - 5.0.0	GRCh38 Reference - 5.0.0	GRCh38 Reference - 5.0.0	GRCh38 Reference - 5.0.0	GRCh38 Reference - 5.0.0	GRCh38 Reference - 5.0.0	GRCh38 Reference - 5.0.0	GRCh38 Reference - 5.0.0	GRCh38 Reference - 5.0.0	GRCh38 Reference - 5.0.0	GRCh38 Reference - 5.0.0	GRCh38 Reference - 5.0.0	GRCh38 Reference - 5.0.0	GRCh38 Reference - 5.0.0	GRCh38 Reference - 5.0.0	GRCh38 Reference - 5.0.0
[truncated: 43 more columns]
